# Supplementary material for: Electrocardiographic Changes Associated with Early Repolarization Pattern in Healthy Young Males
Source: MDPI journal article supplement (doi:10.3390/medicina58081048), 2022-08-03
Supplement: s1 [file s1]

**Supplementary Table S2. The results of the compared ECG parameters of subjects without (“ERP-”) and with (“ERP+”) ERP. The statistically significant differences are marked with bold.**

| ECG Parameter                                              | unit      | "ERP-" Group<br>(n = 182) | "ERP+" Group<br>(n = 38) | Difference<br>between<br>groups | p-Value      |
|------------------------------------------------------------|-----------|---------------------------|--------------------------|---------------------------------|--------------|
| Heart rate module                                          |           |                           |                          |                                 |              |
| Mean Heart rate                                            | beats/min | 71.9 ± 11.7               | 68.9 ± 10.3              | -3.0                            | 0.112        |
| Mean RR interval                                           | ms        | 857.4 ± 145.0             | 891.7 ± 144.2            | -34.3                           | 0.190        |
| QRS axis module                                            |           |                           |                          |                                 |              |
| QRS axis                                                   | grade     | 62.6 ± 16.8               | 64.9 ± 17.3              | +2.3                            | 0.488        |
| Intermediate (30-60 grades)                                | %         | 27.3 %                    | 28.9 %                   | +1.6 %                          | 0.834        |
| Horizontalized (-30-30 grades)                             | %         | 11.4 %                    | 5.3 %                    | -6.1 %                          | 0.227        |
| Verticalized (60-90 grades)                                | %         | 54.5 %                    | 57.8 %                   | +3.3 %                          | 0.707        |
| Extreme left, left anterior hemiblock                      | %         | 1.7 %                     | 2.6 %                    | +0.9 %                          | 0.715        |
| Extreme right, left posterior hemiblock                    | %         | 4.0 %                     | 5.3 %                    | +1.3 %                          | 0.728        |
| No man`s land (-90-180 gardes)                             | %         | 0.6 %                     | 0.0 %                    | -0.6 %                          | 0.531        |
| P wave module                                              |           |                           |                          |                                 |              |
| Sinusal P                                                  | %         | 98.9 %                    | 100.0 %                  | +1.1 %                          | 0.375        |
| Retrograde P in inferior leads                             | %         | 0.6 %                     | 5.3 %                    | +4.7 %                          | 0.059        |
| Wandering pacemaker (≥ 3 P wave morphology)                | %         | 3.4 %                     | 5.3 %                    | +1.9 %                          | 0.601        |
| Bifid P wave in limb leads                                 | %         | 40.6 %                    | 45.9 %                   | +5.3 %                          | 0.547        |
| <b>Negative terminal P in inferior lead(s)</b>             | %         | <b>19.3 %</b>             | <b>34.2 %</b>            | <b>+14.9 %</b>                  | <b>0.044</b> |
| Biphasic P wave in V1                                      | %         | 64.2 %                    | 63.2 %                   | -1.0 %                          | 0.903        |
| Highest P wave amplitude in I, II, III, aVL, aVF (PA max)  | mm        | 1.3 ± 0.4                 | 1.2 ± 0.4                | -0.1                            | 0.176        |
| Smallest P wave amplitude in I, II, III, aVL, aVF (PA min) | mm        | 0.350 ± 0.096             | 0.352 ± 0.090            | +0.002                          | 0.932        |
| Pamplitude max - min                                       | mm        | 0.936 ± 0.401             | 0.858 ± 0.394            | -0.078                          | 0.273        |
| <b>Longest P wave I, II, III, aVL, aVF (PDur max)</b>      | <b>ms</b> | <b>110.4 ± 10.2</b>       | <b>114.2 ± 9.4</b>       | <b>+3.8</b>                     | <b>0.032</b> |
| Shortest P wave I, II, III, aVL, aVF (PDur min)            | ms        | 86.4 ± 14.3               | 88.8 ± 14.9              | +2.4                            | 0.384        |
| PDur max - PDur min                                        | ms        | 24.2 ± 13.8               | 24.8 ± 16.1              | +0.6                            | 0.848        |
| <b>Average P wave duration</b>                             | <b>ms</b> | <b>101.5 ± 9.2</b>        | <b>106.8 ± 9.9</b>       | <b>+5.3</b>                     | <b>0.004</b> |
| Amplitude of positive component of P wave in V1            | mm        | 0.456 ± 0.198             | 0.424 ± 0.205            | -0.031                          | 0.407        |

|                                                                                        |           |                    |                    |                |                  |
|----------------------------------------------------------------------------------------|-----------|--------------------|--------------------|----------------|------------------|
| Amplitude of negative component of P wave in V1                                        | mm        | 0.308 ± 0.202      | 0.288 ± 0.194      | -0.020         | 0.644            |
| PQ (PR) interval (the longest in I, II, III, aVL, aVF)                                 | ms        | 160.4 ± 19.8       | 159.1 ± 16.1       | -1.3           | 0.654            |
| QRS module                                                                             |           |                    |                    |                |                  |
| Q wave in lateral (I, aVL, V5,6) leads                                                 | %         | 82.4 %             | 84.2 %             | +1.8 %         | 0.787            |
| Q wave in inferior (II, III, aVF) leads                                                | %         | 77.3 %             | 84.2 %             | +6.9 %         | 0.345            |
| Q wave amplitude > 2 mm                                                                | %         | 13.1 %             | 13.2 %             | +0.1 %         | 0.998            |
| Major LBBB pattern                                                                     | %         | 0.0 %              | 0.0 %              | 0.0 %          | -                |
| Minor LBBB pattern                                                                     | %         | 2.8 %              | 0.0 %              | -2.8 %         | 0.159            |
| Major RBBB pattern                                                                     | %         | 3.4 %              | 0.0 %              | -3.4 %         | 0.123            |
| Minor RBBB pattern                                                                     | %         | 10.9 %             | 4.6 %              | -6.3 %         | 0.221            |
| <b>Fragmented QRS (notching of QRS &lt;120 ms in at least one lead, excepting aVR)</b> | %         | <b>67.6 %</b>      | <b>92.1 %</b>      | <b>+24.5 %</b> | <b>0.002</b>     |
| Late R/S transition (R<S in V4) in precordial leads                                    | %         | 6.3 %              | 10.5 %             | +4.2 %         | 0.373            |
| Type A ventricular preexcitation (dominant R in V1)                                    | %         | 0.0 %              | 0.0 %              | 0.0 %          | -                |
| Type B ventricular preexcitation (dominant R in V5)                                    | %         | 0.6 %              | 0.0 %              | -0.6 %         | 0.531            |
| Intrinsicoidal deflection in aVL                                                       | ms        | 36.0 ± 10.7        | 34.5 ± 12.7        | -1.5           | 0.491            |
| <b>Intrinsicoidal deflection in V5</b>                                                 | <b>ms</b> | <b>43.4 ± 7.3</b>  | <b>41.0 ± 6.3</b>  | <b>-2.4</b>    | <b>0.045</b>     |
| <b>QRS duration in II</b>                                                              | <b>ms</b> | <b>92.2 ± 15.3</b> | <b>76.9 ± 11.9</b> | <b>-15.3</b>   | <b>&lt;0.001</b> |
| <b>QRS duration in V2</b>                                                              | <b>ms</b> | <b>96.8 ± 11.9</b> | <b>91.8 ± 8.6</b>  | <b>-5.0</b>    | <b>0.003</b>     |
| <b>QRS duration in V5</b>                                                              | <b>ms</b> | <b>92.1 ± 12.9</b> | <b>78.5 ± 9.4</b>  | <b>-13.6</b>   | <b>&lt;0.001</b> |
| <b>Max QRS duration from lead II, V2, V5</b>                                           | <b>ms</b> | <b>98.7 ± 11.8</b> | <b>92.5 ± 8.0</b>  | <b>-6.2</b>    | <b>&lt;0.001</b> |
| Sokolow-Lyon index for LVH (S in V1 or V2 + R in V5 or V6)                             | mm        | 34.6 ± 9.1         | 36.8 ± 6.0         | +2.2           | 0.063            |
| <b>Sokolow-Lyon index for RVH (R in V1 or V2 + S in V5 or V6)</b>                      | <b>mm</b> | <b>11.0 ± 4.0</b>  | <b>9.7 ± 3.3</b>   | <b>-1.3</b>    | <b>0.043</b>     |
| Cornell index for LVH (R in aVL+ S in V3)                                              | mm        | 14.1 ± 5.8         | 12.7 ± 5.4         | -1.4           | 0.150            |
| Max R wave amplitude in V4, V5, V6                                                     | mm        | 19.7 ± 5.2         | 19.2 ± 5.8         | -0.5           | 0.629            |
| ST-T, QT, Tpeak-Tend module                                                            |           |                    |                    |                |                  |
| Juvenile ECG pattern (negative T in V1,2)                                              | %         | 45.5 %             | 42.1 %             | -3.4 %         | 0.707            |
| <b>Male type ECG (ST-elevation &gt; 1 mm in V2-4)</b>                                  | %         | <b>38.6 %</b>      | <b>57.9 %</b>      | <b>+19.3 %</b> | <b>0.029</b>     |
| Tall T waves (>2/3 R in positive QRS leads) in lateral leads                           | %         | 0.6 %              | 0.0 %              | -0.6 %         | 0.535            |

|                                                                   |           |                      |                      |               |                  |
|-------------------------------------------------------------------|-----------|----------------------|----------------------|---------------|------------------|
| Tall T waves (>2/3 R in positive QRS leads) in inferior leads     | %         | 0.0 %                | 0.0 %                | 0.0 %         | -                |
| Tall T waves in negative QRS leads                                | %         | 0.0 %                | 0.0 %                | 0.0 %         | -                |
| ST depression (> 0,5 mm) in lateral leads                         | %         | 0.0 %                | 0.0 %                | 0.0 %         | -                |
| ST depression (> 0,5 mm) in inferior leads                        | %         | 3.4 %                | 0.0 %                | -3.4 %        | 0.123            |
| ST depression (> 0,5 mm) in anterior leads                        | %         | 0.0 %                | 0.0 %                | 0.0 %         | -                |
| Diffuse ST depression (>0.5 mm)                                   | %         | 0.0 %                | 0.0 %                | 0.0 %         | -                |
| Flat T waves (< ± 1mm) in lateral leads                           | %         | 1.7 %                | 7.9 %                | +6.2 %        | 0.067            |
| Flat T waves (< ± 1mm) in inferior leads                          | %         | 7.4 %                | 7.9 %                | +0.5 %        | 0.915            |
| Flat T waves (<± 1mm) in anterior leads                           | %         | 0.0 %                | 2.6 %                | +2.6 %        | 0.062            |
| Diffuse flat T waves (< ± 1mm)                                    | %         | 0.0 %                | 0.0 %                | 0.0 %         | -                |
| Negative T waves (> - 1mm) in lateral leads                       | %         | 0.6 %                | 2.6 %                | +2.0 %        | 0.297            |
| Negative T waves (> - 1mm) in inferior leads                      | %         | 0.6 %                | 2.6 %                | +2.0 %        | 0.297            |
| Negative T waves (> - 1mm) in anterior leads                      | %         | 0.6 %                | 0.0 %                | -0.6 %        | 0.531            |
| Epsilon wave in V1                                                | %         | 1.1 %                | 0.0 %                | -1.1 %        | 0.375            |
| QT average                                                        | ms        | 353.0                | 356.8                | +3.8          | 0.365            |
| QT average corrected (Bazett's formula)                           | ms        | 383.3                | 380.3                | -3.0          | 0.497            |
| QT max                                                            | ms        | 365.9                | 369.5                | +3.6          | 0.388            |
| QT max corrected (Bazett's formula)                               | ms        | 397.7                | 393.9                | -3.8          | 0.476            |
| <b>QT max/QRS in V5</b>                                           |           | <b>4.1 ± 0.6</b>     | <b>4.7 ± 0.6</b>     | <b>+0.6</b>   | <b>&lt;0.001</b> |
| <b>Qt max corrected/QRS in V5</b>                                 |           | <b>4.5 ± 0.8</b>     | <b>5.4 ± 1.1</b>     | <b>+0.9</b>   | <b>&lt;0.001</b> |
| <b>QT dispersion = difference of max and min QT in I, aVF, V2</b> | <b>ms</b> | <b>25.1 ± 12.5</b>   | <b>16.7 ± 9.9</b>    | <b>-8.4</b>   | <b>&lt;0.001</b> |
| <b>QT dispersion corrected (Bazett's formula)</b>                 | <b>ms</b> | <b>26.2 ± 12.5</b>   | <b>17.9 ± 11.4</b>   | <b>-8.3</b>   | <b>&lt;0.001</b> |
| <b>QT dispersion/QT average</b>                                   |           | <b>0.070 ± 0.034</b> | <b>0.046 ± 0.028</b> | <b>-0.024</b> | <b>&lt;0.001</b> |
| <b>Tpeak – Tend average</b>                                       | <b>ms</b> | <b>70.9 ± 8.1</b>    | <b>67.8 ± 8.0</b>    | <b>-3.1</b>   | <b>0.036</b>     |
| <b>T peak– Tend average corrected (Bazett's formula)</b>          | <b>ms</b> | <b>77.1 ± 10.4</b>   | <b>72.4 ± 10.5</b>   | <b>-4.7</b>   | <b>0.016</b>     |
| <b>Tpeak – Tend max</b>                                           | <b>ms</b> | <b>81.5 ± 9.4</b>    | <b>78.6 ± 9.7</b>    | <b>-2.9</b>   | <b>0.101</b>     |
| <b>Tpeak -Tend max corrected (Bazett's formula)</b>               | <b>ms</b> | <b>90.3 ± 14.6</b>   | <b>83.4 ± 13.1</b>   | <b>-6.9</b>   | <b>0.005</b>     |
| <b>Tpeak – Tend average/ QT average</b>                           |           | <b>0.202 ± 0.022</b> | <b>0.190 ± 0.019</b> | <b>-0.012</b> | <b>0.001</b>     |
| <b>Arrhythmia module</b>                                          |           |                      |                      |               |                  |
| <b>Atrial premature beats</b>                                     | <b>%</b>  | <b>0.6 %</b>         | <b>7.9 %</b>         | <b>+7.3 %</b> | <b>0.011</b>     |
| Ventricular premature beatS of RV origin (LBBB pattern)           | %         | 0.0 %                | 2.6 %                | +2.6 %        | 0.062            |

|                                                         |   |       |       |        |       |
|---------------------------------------------------------|---|-------|-------|--------|-------|
| Ventricular premature beats of LV origin (RBBB pattern) | % | 1.7 % | 0.0 % | -1.7 % | 0.418 |
|---------------------------------------------------------|---|-------|-------|--------|-------|

---

**Abbreviations:** LBBB – left boundle branch block, RBBB – right boundle branch block, RVH – right ventricular hypertrophy, LVH – left ventricular hypertrophy
