# Supplementary material for: Electrocardiographic Changes Associated with Early Repolarization Pattern in Healthy Young Males
Source: MDPI journal article supplement (doi:10.3390/medicina58081048), 2022-08-03
Supplement: s1 [file s1]

**Supplementary Table S3. The basic characteristic of subjects without ("ERP-") and with ("ERP+") ERP.**

| ECG Parameter     | unit              | "ERP-" Group<br>(n = 182) | "ERP+" Group<br>(n = 38) | Difference<br>between<br>groups | p-Value |
|-------------------|-------------------|---------------------------|--------------------------|---------------------------------|---------|
| Age               | year              | 21.9 ± 1.7                | 22.2 ± 1.5               | 0.3                             | 0.376   |
| Height            | cm                | 179.7 ± 7.2               | 180.0 ± 7.6              | 0.3                             | 0.819   |
| Weight            | kg                | 75.5 ± 11.4               | 77.0 ± 10.3              | 1.5                             | 0.518   |
| Body mass index   | kg/m <sup>2</sup> | 23.2 ± 2.7                | 23.7 ± 3.0               | 0.5                             | 0.355   |
| Body surface area | m <sup>2</sup>    | 1.93 ± 0.16               | 1.95 ± 0.14              | 0.02                            | 0.434   |
