# Supplementary material for: Electrocardiographic Changes Associated with Early Repolarization Pattern in Healthy Young Males
Source: MDPI journal article supplement (doi:10.3390/medicina58081048), 2022-08-03
Supplement: s1 [file s1]

**Supplementary Table S1** The list of analyzed ECG-parameters. The ECG measurements were performed at amplification of 20 mm/mV, and speed of 50 mm/s

| ECG parameter                                                             | Measurement units or categories |           |
|---------------------------------------------------------------------------|---------------------------------|-----------|
| Heart rate module                                                         |                                 |           |
| Mean RR interval                                                          |                                 | ms        |
| Mean heart rate                                                           |                                 | beats/min |
| QRS axis module                                                           |                                 |           |
| Position                                                                  |                                 | grades    |
| Intermediate (30-60 gr)                                                   | Yes                             | No        |
| Horizontalized (-30-30 gr)                                                |                                 |           |
| Verticalized (60-90 gr)                                                   |                                 |           |
| Extreme left, left anterior hemibloc                                      |                                 |           |
| Extreme right, left posterior hemibloc                                    |                                 |           |
| No man`s land (-90-180 gr)                                                |                                 |           |
| P wave module                                                             |                                 |           |
| Sinusal P wave                                                            | Yes                             | No        |
| Retrograde P in inferior leads                                            |                                 |           |
| Wandering pacemaker (≥ 3 P wave morphology)                               |                                 |           |
| Bifid P wave in limb leads                                                |                                 |           |
| Negative terminal P in inferior lead(s) (Bayes` sign – interatrial block) |                                 |           |
| Biphasic P wave in V1                                                     |                                 |           |
| P wave amplitude module                                                   |                                 |           |
| Highest P wave amplitude in I, II, III, aVL, aVF (PAm <sub>ax</sub> )     |                                 | mm        |
| Smallest P wave amplitude in I, II, III, aVL, aVF (PA <sub>min</sub> )    |                                 |           |
| PAm <sub>ax</sub> -PA <sub>min</sub> (P wave amplitude dispersion)        |                                 |           |
| Amplitude of positive component of P wave in V1                           |                                 |           |
| Amplitude of negative component of P wave in V1                           |                                 |           |
| P wave duration (dur) module                                              |                                 |           |
| Longest P wave in I, II, III, aVL, aVF (Pdur <sub>max</sub> )             |                                 | ms        |
| Shortest P wave in I, II, III, aVL, aVF (Pdur <sub>min</sub> )            |                                 | ms        |
| P wave duration dispersion (Pdur <sub>max</sub> -Pdur <sub>min</sub> )    |                                 | ms        |
| Average P wave duration in limb leads                                     |                                 | ms        |
| PQ (PR) interval (the longer in I, II, III, aVL, aVF)                     |                                 | ms        |
| QRS module                                                                |                                 |           |
| Q wave in lateral (I, aVL, V5,6) leads                                    | Yes                             | No        |
| Q wave in inferior (II, III, aVF) leads                                   |                                 |           |
| Q wave amplitude in any lead > 2 mm                                       |                                 |           |
| Complete LBBB pattern                                                     |                                 |           |
| Incomplete LBBB pattern (Q wave absent in V5,6)                           |                                 |           |

|                                                                       |     |    |
|-----------------------------------------------------------------------|-----|----|
| Complete RBBB pattern                                                 |     |    |
| Incomplete RBBB pattern                                               |     |    |
| Non-specific intraventricular conduction disturbance (fragmented QRS) |     |    |
| Late R/S transition (R<S in V4) in precordial leads                   |     |    |
| Type A ventricular preexcitation (predominant R in V1)                |     |    |
| Type B ventricular preexcitation (predominant R in V5)                |     |    |
| <b>QRS duration module</b>                                            |     |    |
| Intrinsicoid deflection in aVL                                        |     | ms |
| Intrinsicoid deflection in V5                                         |     |    |
| QRS duration in II                                                    |     |    |
| QRS duration in V2                                                    |     |    |
| QRS duration in V5                                                    |     |    |
| <b>QRS amplitude module</b>                                           |     |    |
| Sokolow-Lyon index (S in V1 or V2 + R in V5 or V6)                    |     | mm |
| Sokolow-Lyon index (R in V1 or V2 + S in V5 or V6)                    |     |    |
| Cornell index (R in aVL+ S in V3)                                     |     |    |
| max amplitude of R wave in V4, V5, V6                                 |     |    |
| <b>ERP module</b>                                                     |     |    |
| Maximal amplitude of J-point elevation                                |     | mm |
| ERP (slur or notching) in II, III, aVF                                | Yes | No |
| ERP (slur or notching) in V4-6                                        |     |    |
| ERP (slur or notching) in II, III, aVF, V4-6                          |     |    |
| Slur (and leads with slur)                                            |     |    |
| Notching (and leads with notching)                                    |     |    |
| Male type ECG (ST-elevation > 1 mm in V2-4)                           |     |    |
| ST elevation > 1 mm in other leads                                    |     |    |
| Type I Brugada pattern (including + 1 intercostal space superiorly)   |     |    |
| Type II Brugada pattern (including + 1 intercostal space superiorly)  |     |    |
| Type III Brugada pattern (including + 1 intercostal space superiorly) |     |    |
| <b>T-wave module</b>                                                  |     |    |
| Juvenile ECG pattern (negative T in V1, 2)                            | Yes | No |
| Tall T waves (>2/3 R in positive QRS leads) in lateral leads          |     |    |
| Tall T waves (>2/3 R in positive QRS leads) in inferior leads         |     |    |
| Tall T waves in negative QRS leads                                    |     |    |
| Flat T waves (<± 1mm) in lateral leads                                |     |    |
| Flat T waves (<± 1mm) in inferior leads                               |     |    |
| Flat T waves (<± 1mm) in anterior leads                               |     |    |
| Diffuse flat T waves (<± 1mm)                                         |     |    |
| Negative T waves (> - 1mm) in lateral leads                           |     |    |

|                                                                                                    |     |    |
|----------------------------------------------------------------------------------------------------|-----|----|
| Negative T waves (> - 1mm) in inferior leads                                                       |     |    |
| Negative T waves (> - 1mm) in anterior leads                                                       |     |    |
| <b>ST segment module</b>                                                                           |     |    |
| ST depression (> 0,5 mm) in lateral leads                                                          | Yes | No |
| ST depression (> 0,5 mm) in inferior leads                                                         |     |    |
| ST depression (> 0,5 mm) in anterior leads                                                         |     |    |
| Diffuse ST depression (>0.5 mm)                                                                    |     |    |
| Epsilon wave in V1                                                                                 |     |    |
| <b>QT measurements (II, V2, V5, without leads with T wave amplitude &lt;1,5 mm) module</b>         |     |    |
| QT average                                                                                         |     | ms |
| QT average corrected (Bazett's formula)                                                            |     |    |
| QT max                                                                                             |     |    |
| QT max corrected (Bazett's formula)                                                                |     |    |
| QTmax/QRS in V5                                                                                    |     |    |
| Qtmax corrected/QRS in V5                                                                          |     |    |
| QT dispersion = difference of max and min QT in leads I, aVF, V2                                   |     |    |
| QT dispersion corrected (Bazett's formula)                                                         |     |    |
| QT dispersion/QT average                                                                           |     |    |
| <b>Tpeak-Tend measurements (II, V2, V5, without leads with T wave amplitude &lt;1,5 mm) module</b> |     |    |
| Tpeak-Tend average                                                                                 |     | ms |
| Tpeak-Tend average corrected (Bazett's formula)                                                    |     |    |
| Tpeak-Tend max                                                                                     |     |    |
| Tpeak-Tend max corrected (Bazett's formula)                                                        |     |    |
| Tpeak-Tend average/ QT average                                                                     |     |    |
| Tpeak-Tend average corrected/ QT average corrected                                                 |     |    |
| <b>Arrhythmia module</b>                                                                           |     |    |
| Atrial premature beats(s)                                                                          | Yes | No |
| Ventricular premature beat(s) of RV origin (LBBB pattern)                                          |     |    |
| Ventricular premature beat(s) of LV origin (RBBB pattern)                                          |     |    |

**Abbreviations:** LBBB – left bundle branch block, RBBB – right bundle branch block, RVH – right ventricular hypertrophy, LVH – left ventricular hypertrophy, ERP – early repolarization pattern
